# Supplementary material
Source: PubMed Central journal article supplement (PMC6512305)
Supplement: jamaophthalmol-137-537-s001.pdf [file jamaophthalmol-137-537-s001.pdf]

## Supplementary Online Content

Xu S, Sagiv O, Rubin ML, et al. Validation study of the *AJCC Cancer Staging Manual*, eighth edition, staging system for eyelid and periocular squamous cell carcinoma. *JAMA Ophthalmol*. Published online March 14, 2019.  
doi:10.1001/jamaophthalmol.2019.0238

**eTable.** Baseline staging (*AJCC 7* and *AJCC 8*) by tumor size

**eFigure 1.** Kaplan-Meier survival curve for disease-specific survival of patients with periocular squamous cell carcinoma by nodal metastasis status at last follow-up (n = 109)

**eFigure 2.** Kaplan-Meier curve by T category for local recurrence (*AJCC 7* definition)

This supplementary material has been provided by the authors to give readers additional information about their work.

**eTable.** Baseline and final staging (*AJCC 7* and *AJCC 8*) by tumor size

| 7th-edition staging system |         | 8th-edition staging system |         |
|----------------------------|---------|----------------------------|---------|
| T category                 | N (%)   | T category                 | N (%)   |
| Tis                        | 23 (21) | Tis                        | 23 (21) |
| T1                         | 7 (6)   | T1                         | 13 (12) |
| T2                         | 20 (18) | T2                         | 21 (19) |
| T3                         | 41 (38) | T3                         | 14 (13) |
| T4                         | 18 (17) | T4                         | 38 (35) |

**eFigure 1.** Kaplan-Meier survival curve for disease-specific survival of patients with periocular squamous cell carcinoma by nodal metastasis status at last follow-up (n = 109)

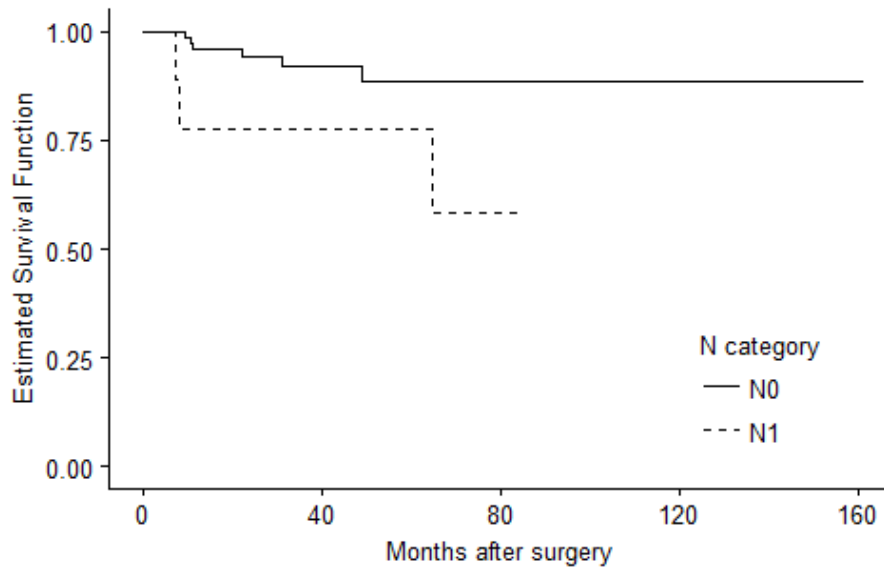

|    |    | No. at risk |    |    |     |     |
|----|----|-------------|----|----|-----|-----|
|    |    | 0           | 40 | 80 | 120 | 160 |
| N0 | 98 | 36          | 4  | 1  | 1   |     |
| N1 | 11 | 4           | 1  | 0  | 0   |     |

**eFigure 2.** Kaplan-Meier curve by T category for local recurrence (AJCC 7 definition)

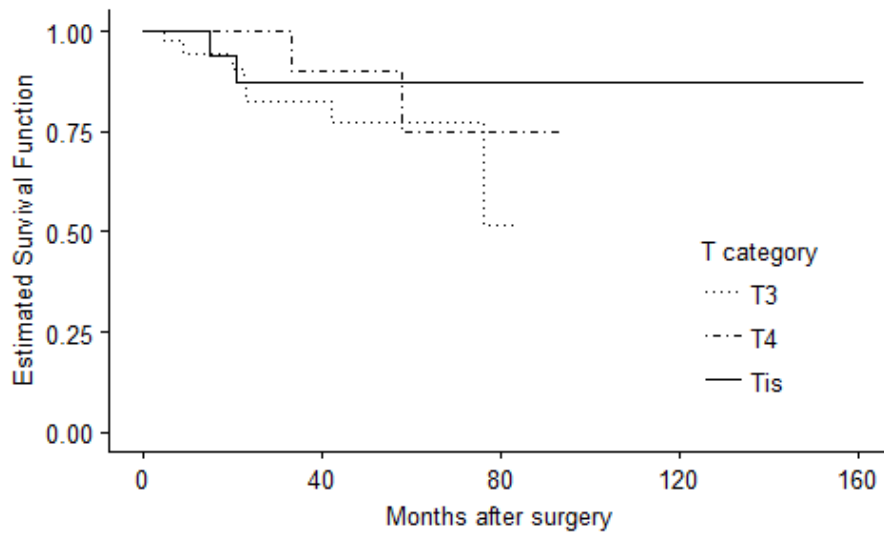

|     |    | No. at risk |    |    |     |     |
|-----|----|-------------|----|----|-----|-----|
|     |    | 0           | 40 | 80 | 120 | 160 |
| T3  | 41 | 15          | 1  | 0  | 0   | 0   |
| T4  | 18 | 9           | 2  | 0  | 0   | 0   |
| T1s | 23 | 7           | 1  | 1  | 1   | 1   |
